# Supplementary material for: Suggested deafness during hypnosis and simulation of hypnosis compared to a distraction and control condition: A study on subjective experience and cortical brain responses
Source: PubMed Central journal article supplement (PMC7595429; doi:10.1371/journal.pone.0240832), 2020-10-29
Supplement: pone.0240832.s001.pdf [file pone.0240832.s001.pdf]

## Supplemental information 1 to the article:

### Suggested deafness during hypnosis and simulation of hypnosis compared to a distraction and control condition: A study on subjective experience and cortical brain responses.

Marcel Franz<sup>1</sup>, Barbara Schmidt<sup>1</sup>, Holger Hecht<sup>1</sup>, Ewald Naumann<sup>2</sup> and Wolfgang H.R. Miltner<sup>1,3</sup>

<sup>1</sup>Department of Clinical Psychology, Friedrich Schiller University Jena, Jena, Germany

<sup>2</sup>Institute of Psychology, University of Trier, Trier, Germany

<sup>3</sup>Medical School of Friedrich Schiller University Jena, Jena, Germany

## METHODS

In the following section, we outline how the three factorial (Condition x Stimulus-Type x Susceptibility-Group) nature of our design was modeled and statistically tested in SPM12. We followed the partitioned error approach as outlined in the SPM wikibook (SPM, 2018). The subject-specific set of 4-by-3 GIFTI images (condition: c1 = hypnosis, c2 = control, c3 = distraction, c4 = simulation; stimulus type: s1 = target, s2 = standard, s3 = distractor) was arranged in the following order: c1s1 c1s2 c1s3 c2s1 c2s2 c2s3 c3s1 c3s2 c3s3 c4s1 c4s2 c4s3. This set was first transformed into four sets of contrast images using the `spm_mesh_calc.m` function and the respective contrast weights  $C$  of **Table S1-1**:

**Table S1-1.** Effects of interest and the corresponding contrast weights to calculate 1<sup>st</sup> level contrast images using the `spm_mesh_calc` function.

| Effect of interest:                                                                 | Contrast Image Set | 1 <sup>st</sup> level Contrast weights                                                                                                                                                                                                                                                                                                               |
|-------------------------------------------------------------------------------------|--------------------|------------------------------------------------------------------------------------------------------------------------------------------------------------------------------------------------------------------------------------------------------------------------------------------------------------------------------------------------------|
| E1 = ME: Group                                                                      | 1                  | $C_1 = [1\ 1\ 1\ 1\ 1\ 1\ 1\ 1\ 1\ 1\ 1\ 1\ 1]$                                                                                                                                                                                                                                                                                                      |
| E2 = ME: Condition; E3 = INT: Group x Condition                                     | 2                  | $C_2 = \begin{bmatrix} 1 & 1 & 1 & -1 & -1 & -1 & 0 & 0 & 0 & 0 & 0 & 0 \\ 0 & 0 & 0 & 1 & 1 & 1 & -1 & -1 & -1 & 0 & 0 & 0 \\ 0 & 0 & 0 & 0 & 0 & 0 & 1 & 1 & 1 & -1 & -1 & -1 \end{bmatrix}$                                                                                                                                                       |
| E4 = ME: Stimulus type; E5 = INT: Group x Stimulus-Type                             | 3                  | $C_3 = \begin{bmatrix} 1 & -1 & 0 & 1 & -1 & 0 & 1 & -1 & 0 & 1 & -1 & 0 \\ 0 & 1 & -1 & 0 & 1 & -1 & 0 & 1 & -1 & 0 & 1 & -1 \end{bmatrix}$                                                                                                                                                                                                         |
| E6 = INT: Condition x Stimulus type;<br>E7 = INT: Group x Condition x Stimulus type | 4                  | $C_4 = \begin{bmatrix} 1 & -1 & 0 & -1 & 1 & 0 & 0 & 0 & 0 & 0 & 0 & 0 \\ 0 & 1 & -1 & 0 & -1 & 1 & 0 & 0 & 0 & 0 & 0 & 0 \\ 0 & 0 & 0 & 1 & -1 & 0 & -1 & 1 & 0 & 0 & 0 & 0 \\ 0 & 0 & 0 & 0 & 1 & -1 & 0 & -1 & 1 & 0 & 0 & 0 \\ 0 & 0 & 0 & 0 & 0 & 0 & 1 & -1 & 0 & -1 & 1 & 0 \\ 0 & 0 & 0 & 0 & 0 & 0 & 0 & 1 & -1 & 0 & -1 & 1 \end{bmatrix}$ |

E = effect, ME = main effect, INT = interaction

Then, for each set of contrast images, two General Linear Models (GLM) were specified and estimated to test for effects of interest. The respective factorial design specifications and 2<sup>nd</sup> level contrasts are summarized in **Table S1-2**.

Suggested deafness during hypnosis and simulation of hypnosis compared to a distraction and control condition: A study on subjective experience and cortical brain responses.

**Table S1-2.** Factorial design specification.

| Effect of interest:                    | Contrast Image Set <sup>1</sup> | Factorial Design                                              | 2 <sup>nd</sup> level Contrast Weights                                                                                                                                                                                                                                                                                      |
|----------------------------------------|---------------------------------|---------------------------------------------------------------|-----------------------------------------------------------------------------------------------------------------------------------------------------------------------------------------------------------------------------------------------------------------------------------------------------------------------------|
| ME: Group                              | 1                               | Two sample t-test <sup>a,c</sup>                              | F-contrast [1 -1]                                                                                                                                                                                                                                                                                                           |
| ME: Condition                          | 2                               | One-way ANOVA <sup>b,c</sup><br>(3 levels)                    | F-contrast $\begin{bmatrix} 1 & 0 & 0 \\ 0 & 1 & 0 \\ 0 & 0 & 1 \end{bmatrix}$                                                                                                                                                                                                                                              |
| INT: Group x Condition                 | 2                               | One-way ANOVA <sup>a,c</sup><br>(6 levels, 3 for each group)  | F-contrast $\begin{bmatrix} 1 & 0 & 0 & -1 & 0 & 0 \\ 0 & 1 & 0 & 0 & -1 & 0 \\ 0 & 0 & 1 & 0 & 0 & -1 \end{bmatrix}$                                                                                                                                                                                                       |
| ME: Stimulus type                      | 3                               | Two sample t-test <sup>b,c</sup>                              | F-contrast $\begin{bmatrix} 1 & 0 \\ 0 & 1 \end{bmatrix}$                                                                                                                                                                                                                                                                   |
| INT: Group x Stimulus type             | 3                               | One-way ANOVA<br>(4 levels, 2 for each group) <sup>a,c</sup>  | F-contrast $\begin{bmatrix} 1 & 0 & -1 & 0 \\ 0 & 1 & 0 & -1 \end{bmatrix}$                                                                                                                                                                                                                                                 |
| INT: Condition x Stimulus type         | 4                               | One-way ANOVA<br>(6 levels) <sup>b,c</sup>                    | F-contrast $\begin{bmatrix} 1 & 0 & 0 & 0 & 0 & 0 \\ 0 & 1 & 0 & 0 & 0 & 0 \\ 0 & 0 & 1 & 0 & 0 & 0 \\ 0 & 0 & 0 & 1 & 0 & 0 \\ 0 & 0 & 0 & 0 & 1 & 0 \\ 0 & 0 & 0 & 0 & 0 & 1 \end{bmatrix}$                                                                                                                               |
| INT: Group x Condition x Stimulus type | 4                               | One-way ANOVA<br>(12 levels, 6 for each group) <sup>a,c</sup> | F-contrast $\begin{bmatrix} 1 & 0 & 0 & 0 & 0 & -1 & 0 & 0 & 0 & 0 & 0 \\ 0 & 1 & 0 & 0 & 0 & 0 & -1 & 0 & 0 & 0 & 0 \\ 0 & 0 & 1 & 0 & 0 & 0 & 0 & -1 & 0 & 0 & 0 \\ 0 & 0 & 0 & 1 & 0 & 0 & 0 & 0 & -1 & 0 & 0 \\ 0 & 0 & 0 & 0 & 1 & 0 & 0 & 0 & 0 & -1 & 0 \\ 0 & 0 & 0 & 0 & 0 & 1 & 0 & 0 & 0 & 0 & -1 \end{bmatrix}$ |

<sup>1</sup> see Table S1-1

(<sup>a</sup>) independent measurements between levels (<sup>b</sup>) dependent measurements between levels (<sup>c</sup>) measurements in each level are assumed to have unequal variance

## RESULTS

### SENSOR-LEVEL ANALYSIS

#### *Approach 1: Statistics on single-electrode analysis*

**Table S1-3.** Post hoc comparisons – Condition. N1 amplitudes at electrode E8.

| <b>contrast</b> | <b>Mean difference</b> | <b>SE</b> | <b>df</b> | <b>t</b> | <b>p</b> |
|-----------------|------------------------|-----------|-----------|----------|----------|
| CON – DIS       | 0.01                   | 0.26      | 244.76    | 0.03     | 1.00     |
| CON – HYP       | -0.33                  | 0.27      | 245.10    | -1.24    | 1.00     |
| CON – SIM       | -0.43                  | 0.26      | 244.97    | -1.63    | .52      |
| DIS – HYP       | -0.34                  | 0.24      | 245.97    | -1.40    | .81      |
| HYP – SIM       | -0.10                  | 0.24      | 255.76    | -0.41    | 1.00     |

P-value adjusted (Bonferroni method) for comparing a family of 5  
Degrees-of-freedom method: Satterthwaite  
Results are averaged over the levels of: Group, Stimulus

**Table S1-4.** Post hoc comparisons – Stimulus. N1 amplitudes at electrode E8.

| <b>contrast</b>       | <b>Mean difference</b> | <b>SE</b> | <b>df</b> | <b>t</b> | <b>p</b> |
|-----------------------|------------------------|-----------|-----------|----------|----------|
| Distractor – Standard | -0.64                  | 0.20      | 344.23    | -3.15    | .005**   |
| Distractor – Target   | 0.50                   | 0.24      | 351.83    | 2.10     | .11      |
| Standard – Target     | 1.14                   | 0.21      | 324.37    | 5.45     | <.001*** |

P-value adjusted (Bonferroni method) for comparing a family of 3  
Degrees-of-freedom method: satterthwaite  
Results are averaged over the levels of: Group, Condition

**Table S1-5.** Post hoc comparisons – Condition. P3b amplitudes at electrode E29.

| <b>contrast</b> | <b>Mean difference</b> | <b>SE</b> | <b>df</b> | <b>t</b> | <b>p</b> |
|-----------------|------------------------|-----------|-----------|----------|----------|
| CON – DIS       | 1.35                   | 0.43      | 135.85    | 3.17     | .01*     |
| CON – HYP       | 2.52                   | 0.42      | 144.91    | 5.98     | <.001*** |
| CON – SIM       | 3.28                   | 0.40      | 135.17    | 8.13     | <.001*** |
| DIS – HYP       | 1.17                   | 0.39      | 135.76    | 2.99     | .016*    |
| HYP – SIM       | 0.76                   | 0.37      | 143.38    | 2.08     | .196     |

P-value adjusted (Bonferroni method) for comparing a family of 5  
Degrees-of-freedom method: Satterthwaite  
Results are averaged over the levels of: Group, Stimulus

**Table S1-6.** Post hoc comparisons – Stimulus. P3b amplitudes at electrode E29.

| <b>contrast</b>       | <b>Mean difference</b> | <b>SE</b> | <b>df</b> | <b>t</b> | <b>p</b> |
|-----------------------|------------------------|-----------|-----------|----------|----------|
| Distractor – Standard | 1.99                   | .19       | 206.09    | 1.24     | <.001*** |
| Distractor – Target   | -4.40                  | .42       | 257.94    | -1.57    | <.001*** |
| Standard – Target     | -6.39                  | .38       | 188.73    | -16.86   | <.001*** |

P-value adjusted (Bonferroni method) for comparing a family of 3  
Degrees-of-freedom method: satterthwaite  
Results are averaged over the levels of: Group, Condition

Suggested deafness during hypnosis and simulation of hypnosis compared to a distraction and control condition: A study on subjective experience and cortical brain responses.

**Table S1-7.** Post hoc comparisons – Condition by Stimulus. P3b amplitudes at electrode E29.

| stimulus   | contrast  | Mean difference | SE   | df    | <i>t</i> | <i>p</i> |
|------------|-----------|-----------------|------|-------|----------|----------|
| Distractor | CON - DIS | 1.57            | 0.54 | 79.43 | 2.92     | .069     |
|            | CON - HYP | 2.17            | 0.59 | 89.10 | 3.67     | .006**   |
|            | CON - SIM | 2.86            | 0.54 | 80.60 | 5.25     | <.001*** |
|            | DIS - HYP | 0.60            | 0.49 | 86.54 | 1.22     | 1        |
|            | HYP - SIM | 0.69            | 0.50 | 87.95 | 1.38     | 1        |
| Standard   | CON - DIS | -0.05           | 0.19 | 86.49 | -0.26    | 1        |
|            | CON - HYP | 0.28            | 0.21 | 91.25 | 1.33     | 1        |
|            | CON - SIM | 0.19            | 0.19 | 80.48 | 1.02     | 1        |
|            | DIS - HYP | 0.33            | 0.18 | 89.55 | 1.78     | 1        |
|            | HYP - SIM | -0.09           | 0.17 | 84.50 | -0.50    | 1        |
| Target     | CON - DIS | 2.52            | 1.14 | 91.43 | 2.21     | .445     |
|            | CON - HYP | 5.10            | 1.10 | 89.49 | 4.65     | <.001*** |
|            | CON - SIM | 6.79            | 1.06 | 86.84 | 6.38     | <.001*** |
|            | DIS - HYP | 2.58            | 1.05 | 91.30 | 2.46     | .235     |
|            | HYP - SIM | 1.69            | 0.96 | 91.43 | 1.75     | 1        |

P-value adjusted (Bonferroni method) for comparing a family of 15

Degrees-of-freedom method: satterthwaite

Results are averaged over the levels of: Group

## Approach 2: Statistics on Topography-by-Time-Cluster-Analyses

### ▪ N1 window (70–130 ms)

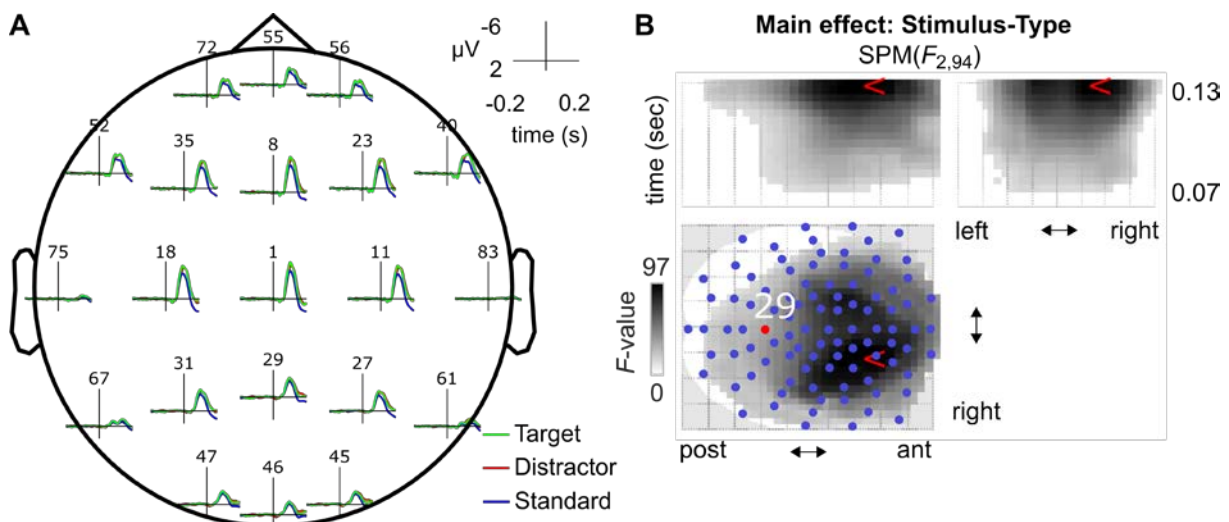

**Figure S1-1.** (A) Grandaverage N1 waveforms (pooled across subjects and conditions) for target (green), distractor (red), and standard (blue) stimulus type at selected electrode sites (21 out of 91 recorded). Data are referenced to linked mastoids. (B) Main effect of Stimulus-Type within N1 window (70–130 ms). A paired-sample *t*-test (within-subject) was performed and the results were assessed with F-contrast. The summary statistic scalp-time data volume was thresholded at  $p < .001$  (uncorrected) with FWE correction at cluster-level,  $p < .05$ , based on random field theory. Blue dots mark electrode sites and the redarrows point to the global maximum. For details, see **Table S1-8**.

Suggested deafness during hypnosis and simulation of hypnosis compared to a distraction and control condition: A study on subjective experience and cortical brain responses.

**Table S1-8.** Main effect of factor Stimulus-Type within N1 window (70–130 ms). Statistical results of scalp-time analysis.

| Cluster-level  |       | Peak-level |                   |    |    |     |
|----------------|-------|------------|-------------------|----|----|-----|
| $P_{FWE-corr}$ | $K_E$ | $F$ -value | $P_{uncorrected}$ | mm | mm | ms  |
| <.001          | 7064  | 97.26      | <.001             | 21 | 24 | 128 |

Statistics:  $p_{FWE-corr}$  = Family-wise-error corrected  $p$ -values adjusted for search volume.  $K_E$  = cluster with  $K$  elements. Height threshold:  $F = 7.44$ ,  $p = .001$  (uncorrected);  $df = (2, 94)$ ; Extent threshold:  $k = 135$  bins; Smoothness FWHM = 32.2 47.3 22.2 mm mm ms; Expected bins per cluster  $\langle k \rangle = 135.4$ ; Search vol.: 1182575 = 12942 bins = 29.2 resels; Bin size: 4.2 5.4 4.0 mm mm ms; (resel = 370 bins).

▪ **P3b window (320–470 ms)**

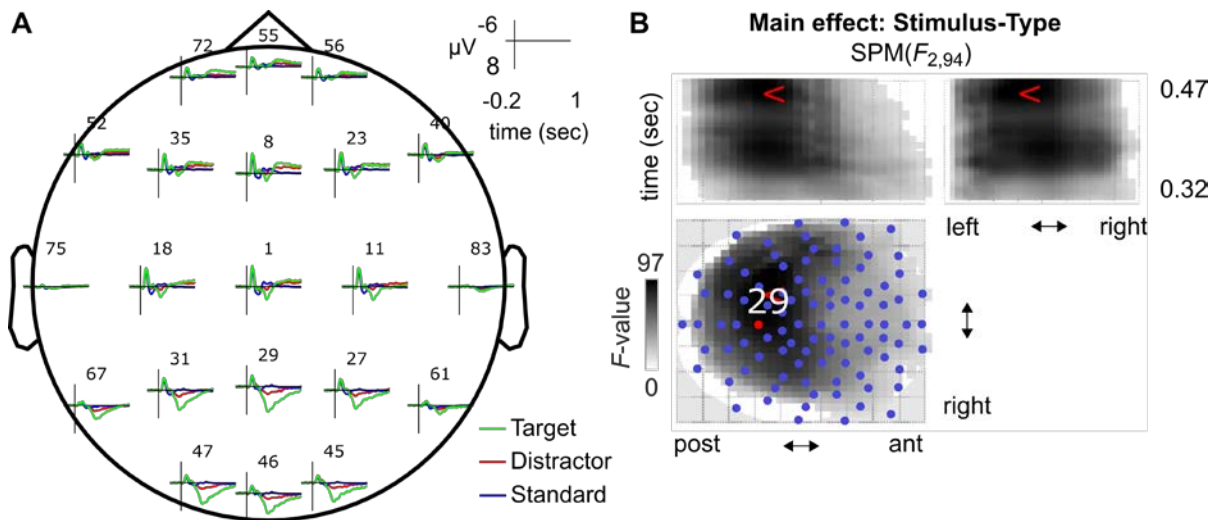

**Figure S1-2.** (A) Grandaverage waveforms (pooled across subjects and conditions) for target (green), distractor (red), and standard (blue) stimulus type at selected electrode sites (21 out of 96 recorded). Data are referenced to linked mastoids. (B) Main effect of Stimulus-Type within P3b window (320–470 ms). A paired-sample  $t$ -test (within subject) was performed and the results were assessed with F-contrast. The summary statistic scalp-time data volume was thresholded at  $p < .001$  (uncorrected) with FWE correction  $p < .05$  at cluster-level, based on random field theory. Blue dots mark electrode sites and the grey arrows point to the global maximum. For details, see **Table S1-9**.

**Table S1-9.** Main effect of factor Stimulus-Type within P3b window (320–470 ms). Statistical results of scalp-time analysis.

| Cluster-level  |       | Peak-level |                   |     |     |     |
|----------------|-------|------------|-------------------|-----|-----|-----|
| $P_{FWE-corr}$ | $K_E$ | $F$ -value | $P_{uncorrected}$ | mm  | mm  | ms  |
| <.001          | 24201 | 96.49      | <.001             | -17 | -41 | 456 |

Statistics:  $p_{FWE-corr}$  = Family-wise-error corrected  $p$ -values adjusted for search volume.  $K_E$  = cluster with  $K$  elements. Height threshold:  $F = 7.33$ ,  $p = .001$  (uncorrected);  $df = (2, 94)$ ; Extent threshold:  $k = 54$  bins;

Suggested deafness during hypnosis and simulation of hypnosis compared to a distraction and control condition:  
A study on subjective experience and cortical brain responses.

Smoothness FWHM = 35.3 5.1 36.6 mm mm ms; Expected bins per cluster  $\langle k \rangle = 54.35$ ; Search vol.: 2808136 = 30732 bins = 37.7 resels; Bin size: 4.2 5.4 4.0 mm mm ms; (resel = 709 bins).

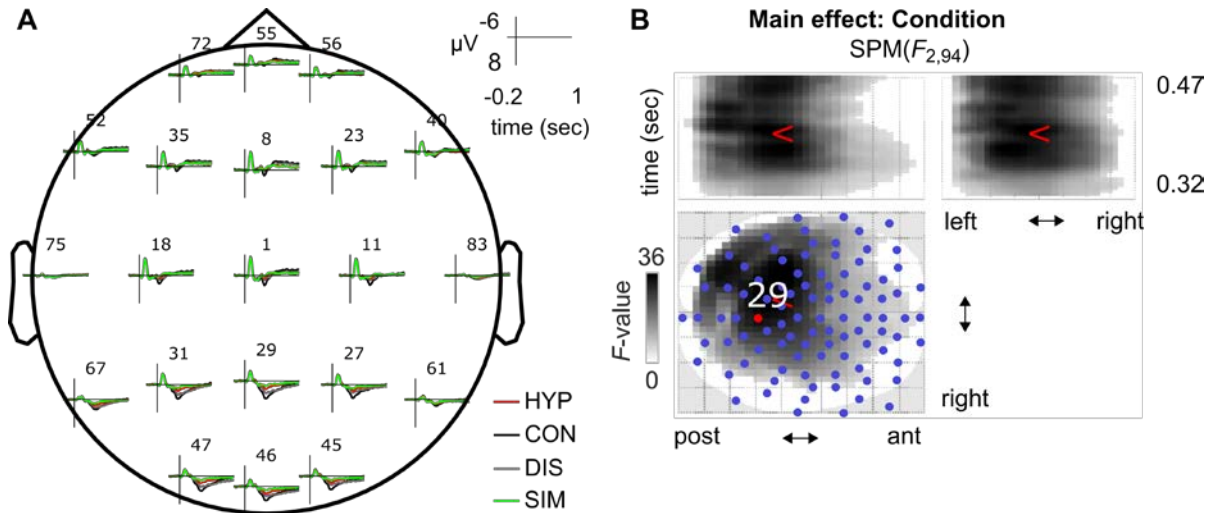

**Figure S1-3.** (A) Grandaverage waveforms (pooled across subjects and Stimulus-Type) at selected electrode sites (21 out of 64 recorded) in hypnosis (HYP, red), control (CON, black), distraction (DIS, grey), and simulation (SIM, green). Data are referenced to linked mastoids. (B) Main effect of Condition (HYP < CON) within P3b window (320–470 ms). A one-sample  $t$ -test was performed and the results were assessed with a  $t$ -contrast. The summary statistic scalp-time data volume was thresholded at  $p < .001$  (uncorrected) with FWE correction at cluster-level,  $p < .05$ , based on random field theory. Blue dots mark electrode sites and the red arrows point to the global maximum. For details, see **Table S1-10**.

**Table S1-10.** Main effect of factor Condition. Statistical results of scalp-time analysis.

| Cluster-level  |       | Peak-level |                   |    |     |     |
|----------------|-------|------------|-------------------|----|-----|-----|
| $P_{FWE-corr}$ | $K_E$ | $F$ -value | $P_{uncorrected}$ | mm | mm  | ms  |
| <.001          | 17514 | 36.1       | <.001             | -8 | -36 | 400 |

Statistics:  $p_{FWE-corr}$  = Family-wise-error corrected  $p$ -values adjusted for search volume.  $K_E$  = cluster with  $K$  elements. Height threshold:  $t = 3.23$ ,  $p = .001$  (uncorrected);  $df = 59$ ; Extent threshold:  $k = 49$  bins; Smoothness FWHM = 36.8 49.8 33.7 mm mm ms; Expected bins per cluster,  $\langle k \rangle = 49.38$ ; Search vol.: 2801649 = 30661 bins = 38.7 resels; Bin size: 4.2 5.4 4.0 mm mm ms; (resel = 677 bins).

Suggested deafness during hypnosis and simulation of hypnosis compared to a distraction and control condition: A study on subjective experience and cortical brain responses.

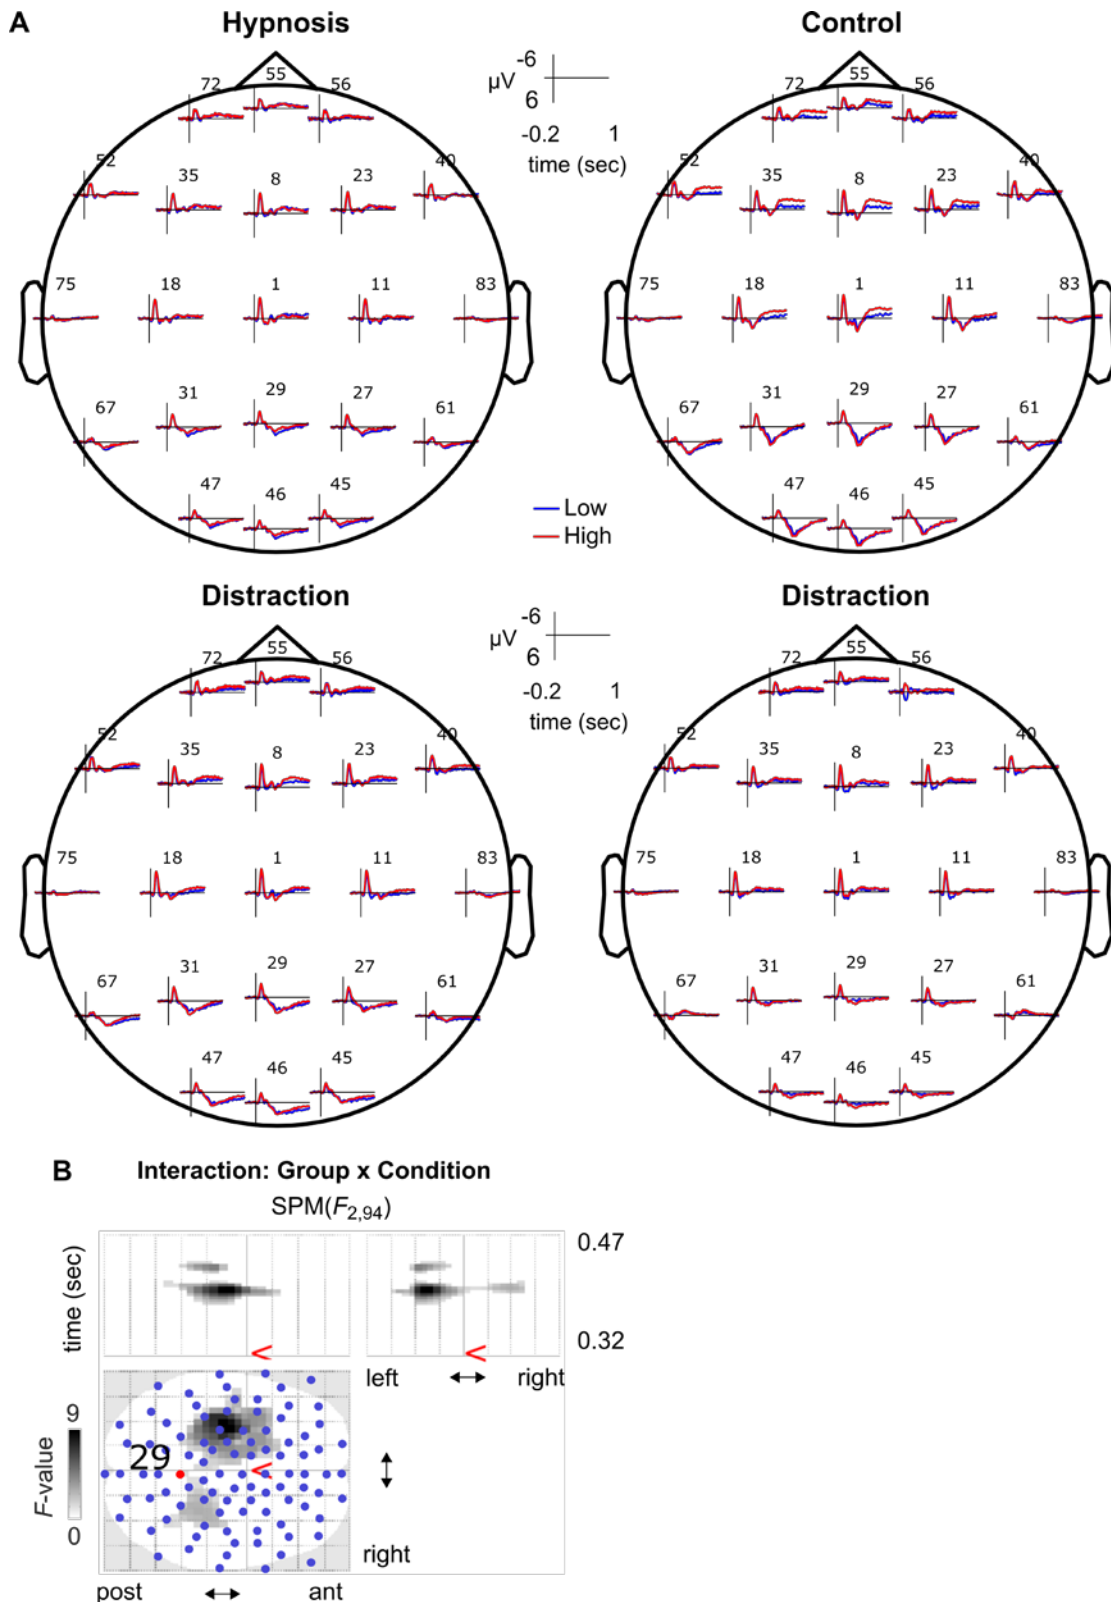

**Figure S1-4.** (A) Grandaverage waveforms (pooled across Stimulus-Type) for low and high suggestibles at selected electrode sites (21 out of 96 recorded) in hypnosis (HYP, red), control (CON, black), distraction (DIS, grey), and simulation (SIM, green). Data are referenced to linked mastoids. (B) Interaction of Susceptibility-Group x Condition within P3b window (320–470 ms). A two-sample  $t$ -test was performed and the results were assessed with an  $F$ -contrast. The summary statistic scalp-time data volume was thresholded at  $p < .001$  (uncorrected) with FWE correction at cluster-level,  $p < .05$ , based on random field theory. Blue dots mark electrode sites and the grey arrows point to the global maximum. For details, see **Table S1-11**.

Suggested deafness during hypnosis and simulation of hypnosis compared to a distraction and control condition: A study on subjective experience and cortical brain responses.

**Table S1-11.** Interaction of Susceptibility-Group x Condition within P3b window (320–470 ms). Statistical results of scalp-time analysis.

| Cluster-level  |       | Peak-level |                   |     |     |     |
|----------------|-------|------------|-------------------|-----|-----|-----|
| $P_{FWE-corr}$ | $K_E$ | $F$ -value | $P_{uncorrected}$ | mm  | mm  | ms  |
| <.001          | 320   | 9.2        | <.001             | -26 | -14 | 396 |

Statistics:  $p_{FWE-corr}$  = Family-wise-error corrected  $p$ -values adjusted for search volume.  $K_E$  = cluster with  $K$  elements. Height threshold:  $F = 5.73$ ,  $p = .001$  (uncorrected);  $df = 3, 181$ ; Extent threshold:  $k = 48$  bins; Smoothness FWHM = 37.2 51.0 31.8 mm mm ms; Expected bins per cluster,  $\langle k \rangle = 34.2$ ; Search vol.: 2801649 = 30661 bins = 39.7 resels; Bin size: 4.2 5.4 4.0 mm mm ms; (resel = 660 bins).

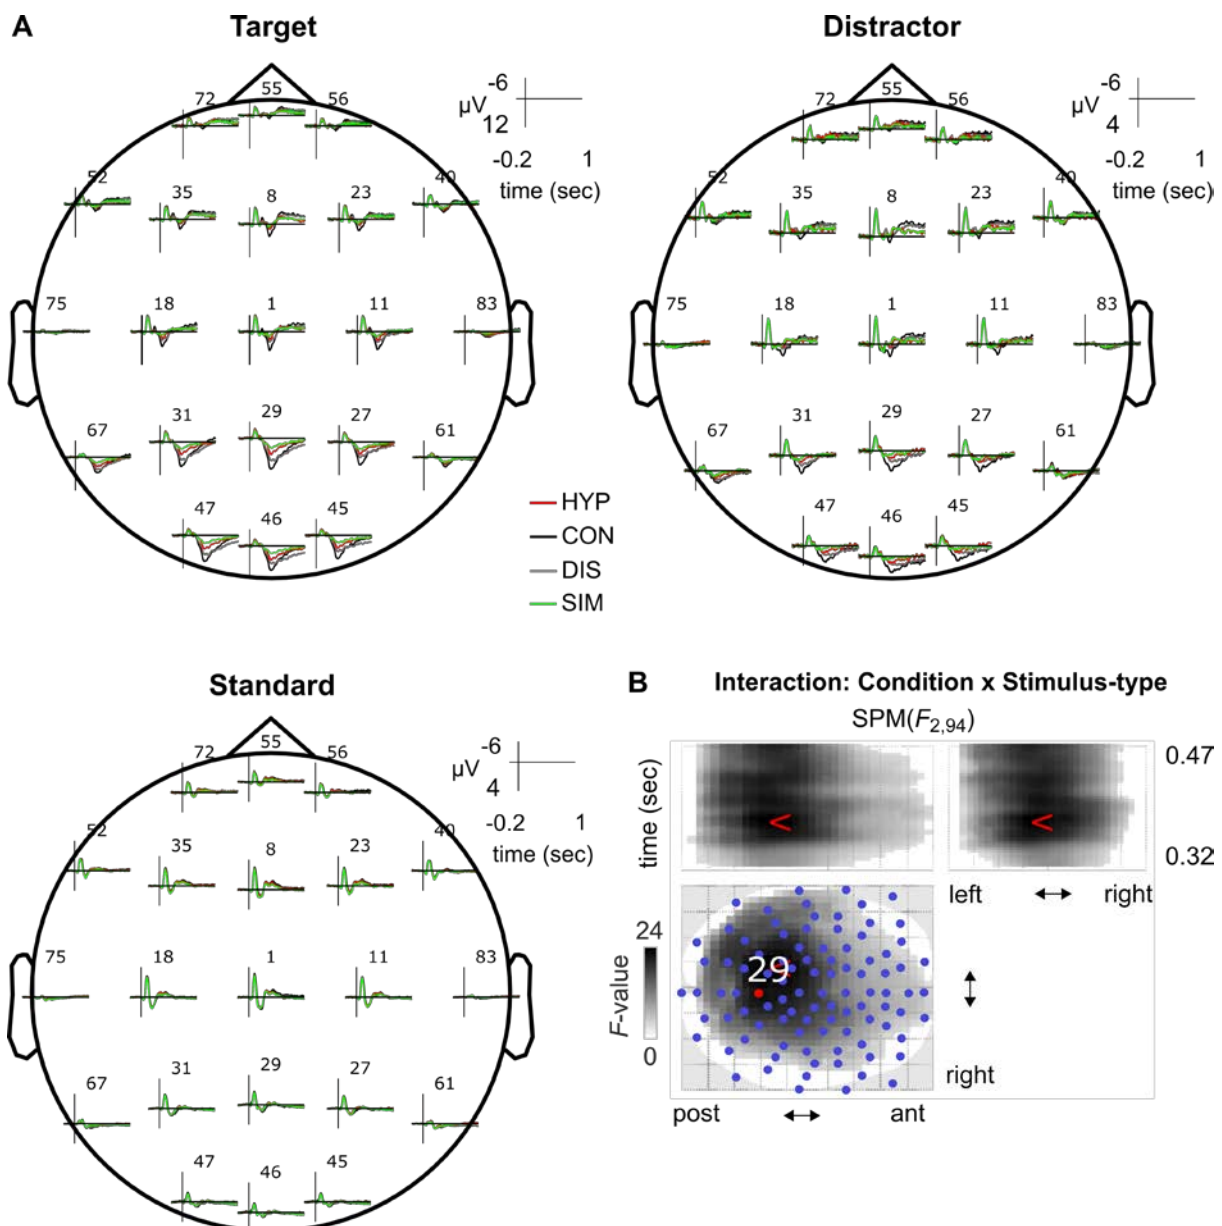

**Figure S1-5.** (A) Grandaverage waveforms (pooled across subjects) for target, distractor, and standard stimulus at selected electrode sites (21 out of 96 recorded) in hypnosis (HYP, red), control (CON, black), distraction (DIS, grey), and simulation (SIM, green). Data are referenced to linked mastoids. (B) Interaction of Condition x Stimulus-Type within P3b window (320–470 ms). A two-sample  $t$ -test was performed and the results were assessed



Suggested deafness during hypnosis and simulation of hypnosis compared to a distraction and control condition: A study on subjective experience and cortical brain responses.

with an  $F$ -contrast. The summary statistic scalp-time data volume was thresholded at  $p < .001$  (uncorrected) with FWE correction at cluster-level,  $p < .05$ , based on random field theory. Blue dots mark electrode sites and the grey arrows point to the global maximum. For details, see **Table S1-12**.

**Table S1-12.** Interaction of Condition x Stimulus-Type within P3b window (320–470 ms). Statistical results of scalp-time analysis.

| Cluster-level  |       | Peak-level |                   |     |     |     |
|----------------|-------|------------|-------------------|-----|-----|-----|
| $P_{FWE-corr}$ | $K_E$ | $F$ -value | $P_{uncorrected}$ | mm  | mm  | ms  |
| <.001          | 18380 | 23.8       | <.001             | -13 | -41 | 376 |

Statistics:  $p_{FWE-corr}$  = Family-wise-error corrected  $p$ -values adjusted for search volume.  $K_E$  = cluster with  $K$  elements. Height threshold:  $t = 0$ ,  $p = .001$  (uncorrected);  $df = 6, 282$ ; Extent threshold:  $k = 34$  bins; Smoothness FWHM = 35.6 49.1 26.8 mm mm ms; Expected bins per cluster,  $\langle k \rangle = 34.2$ ; Search vol.: 2777252 = 30394 bins = 47.8 resels; Bin size: 4.2 5.4 4.0 mm mm ms; (resel = 514 bins).

**Table S1-13.** Statistical results of the  $t$ -contrasts for the scalp-time data separated by stimulus type and condition to disentangle the interaction Condition x Stimulus-Type at sensor-level within the P3b window (320–470 ms).

| Stimulus                 | $t$ -Contrasts (CON>HYP) |       |            |              |     |     |     |
|--------------------------|--------------------------|-------|------------|--------------|-----|-----|-----|
|                          | Cluster-level            |       | Peak-level |              |     |     |     |
|                          | $P_{FWE-corr}$           | $K_E$ | $t$ -value | $P_{uncorr}$ | mm  | mm  | ms  |
| <b>Target</b>            | <.001                    | 16471 | 8.21       | <.001        | -4  | -30 | 356 |
| <b>Distractor</b>        | <.001                    | 5126  | 5.16       | <.001        | -34 | -68 | 408 |
| <b>Standard</b>          | <.001                    | 3623  | 5.45       | <.001        | -38 | -9  | 352 |
| $t$ -Contrasts (DIS>HYP) |                          |       |            |              |     |     |     |
| <b>Target</b>            | <.001                    | 4383  | 5.61       | <.001        | -13 | -30 | 468 |
| <b>Standard</b>          | <.001                    | 1522  | 4.66       | <.001        | -38 | -14 | 356 |
| $t$ -Contrasts (SIM<HYP) |                          |       |            |              |     |     |     |
| <b>Target</b>            | <.001                    | 3598  | 4.50       | <.001        | -51 | -25 | 468 |
| $t$ -Contrasts (SIM>HYP) |                          |       |            |              |     |     |     |
| <b>Standard</b>          | <.001                    | 1535  | 4.93       | <.001        | 47  | 40  | 324 |

Statistics:  $p_{FWE-corr}$  = Family-wise-error corrected  $p$ -values adjusted for search volume.  $K_E$  = cluster with  $K$  elements; Height threshold:  $t = 3.12$ ,  $p = .001$  (uncorrected);  $df = 490$ ; Extent threshold:  $k = 76$  bins; Smoothness FWHM = 39.1 52.6 28.8 mm mm ms; Expected bins per cluster,  $\langle k \rangle = 75.6$ ; Search vol.: 2739788 = 29984 bins = 34.6 resels

## SOURCE ANALYSIS

**Table S1-14.** Statistical results of the one-sample *t*-test in the control (CON). Table shows sources that revealed significant activities during target, standard and distractor processing within the P3b window (320–470 ms).

| Region                 | CON: Target   |                |       |            |              |     |      |     |
|------------------------|---------------|----------------|-------|------------|--------------|-----|------|-----|
|                        | Cluster-level |                |       | Peak-level |              |     |      |     |
|                        | $p_{Label}$   | $p_{FWE-corr}$ | $K_E$ | $t$ -value | $p_{uncorr}$ | MNI |      |     |
|                        |               |                |       |            |              | mm  | mm   | mm  |
| r MTG                  | .53           | <.001          | 109   | 6.49       | <.001        | 62  | -18  | -17 |
| l PCu                  | .48           | <.001          | 160   | 6.08       | <.001        | -9  | -61  | 51  |
| r PCu                  | .38           | <.001          | 132   | 6.07       | <.001        | 10  | -59  | 54  |
| l MTG                  | .05           | .001           | 104   | 5.95       | <.001        | -47 | -13  | -15 |
| r PrG                  | .32           | .006           | 70    | 5.86       | <.001        | 6   | -25  | 71  |
| r LOC                  | .40           | <.001          | 118   | 5.79       | <.001        | 38  | -81  | -17 |
| l PrG                  | .25           | .012           | 59    | 5.70       | <.001        | -8  | -16  | 72  |
| r MFG                  | .60           | .031           | 44    | 5.55       | <.001        | 43  | 21   | 44  |
| l SPL                  | .36           | .014           | 56    | 5.54       | <.001        | -38 | -40  | 60  |
| l MFG                  | .56           | .033           | 43    | 5.32       | <.001        | -34 | 27   | 43  |
| l FP                   | .47           | .027           | 46    | 5.10       | <.001        | -11 | 66   | 0   |
| l OFG                  | .40           | .012           | 59    | 4.89       | <.001        | -22 | -78  | -7  |
| l ITG                  | .40           | .007           | 67    | 4.42       | <.001        | -55 | -62  | -12 |
| <b>CON: Standard</b>   |               |                |       |            |              |     |      |     |
| l PrG                  | .63           | .005           | 94    | 9.06       | <.001        | -62 | -12  | 19  |
| l MTG                  | .45           | <.001          | 521   | 8.41       | <.001        | -54 | 1    | -34 |
| r COC                  | .39           | <.001          | 169   | 8.32       | <.001        | 56  | -14  | 19  |
| l FP                   | .11           | <.001          | 156   | 8.02       | <.001        | -16 | 58   | 13  |
| r MTG                  | .32           | <.001          | 464   | 7.78       | <.001        | 54  | 4    | -30 |
| No label               |               | .001           | 136   | 7.15       | <.001        | 21  | 23   | 34  |
| l SMG                  | .53           | .012           | 76    | 6.98       | <.001        | -60 | -50  | 29  |
| r FP                   | .54           | <.001          | 181   | 6.30       | <.001        | 17  | 64   | 10  |
| l MFG                  | .04           | <.001          | 165   | 5.84       | <.001        | -25 | 22   | 33  |
| r SMC                  | .35           | .036           | 51    | 5.67       | <.001        | 9   | 4    | 68  |
| r SPL                  | .37           | .028           | 57    | 5.32       | <.001        | 20  | -53  | 61  |
| l LOC                  | .26           | .013           | 73    | 5.27       | <.001        | -18 | -59  | 58  |
| l SPL                  | .36           | .031           | 54    | 5.10       | <.001        | -38 | -40  | 60  |
| r PrG                  | .39           | .036           | 51    | 4.71       | <.001        | 7   | -41  | 70  |
| <b>CON: Distractor</b> |               |                |       |            |              |     |      |     |
| l STG                  | .07           | .001           | 97    | 7.65       | <.001        | -47 | -9   | -16 |
| r MTG                  | .08           | .002           | 91    | 7.16       | <.001        | 48  | -7   | -22 |
| r MFG                  | .28           | .021           | 53    | 6.45       | <.001        | 28  | 28   | 36  |
| l MFG                  | .41           | .031           | 46    | 6.01       | <.001        | -28 | 26   | 49  |
| l SPL                  | .46           | .013           | 61    | 5.46       | <.001        | -17 | -56  | 67  |
| r SPL                  | .31           | .015           | 58    | 5.10       | <.001        | 14  | -56  | 68  |
| r OP                   | .63           | .002           | 96    | 5.08       | <.001        | 17  | -102 | -7  |
| r PCG                  | .29           | .025           | 50    | 5.00       | <.001        | 12  | -18  | 71  |

MNI = Montreal Neurological Institute Coordinate System; l = left; r = right; MTG = middle temporal gyrus; SPL = superior parietal lobule; LOC = lateral occipital cortex; OFG = occipital fusiform gyrus; PrG = precentral gyrus; SFG = superior frontal gyrus; SMA = supplementary motor cortex (juxtastriatal lobule cortex);  $p_{Label}$  = probability of the vertex being a member of the different labelled regions within the Harvard-Oxford Subcortical/Cortical Structural Atlas.  $K_E$  = cluster with  $K_E$  elements; Statistics:  $p_{FWE-corr}$  = Family-wise-error corrected *p*-values adjusted for search volume. Height threshold:  $T = 3.12$ ,  $p = .001$  (uncorrected);  $df = [1, 94]$ ; HYP: Extent threshold: 45; Smoothness FWHM = 4.0 4.0 4.0 (vertices); Expected bins per cluster,  $\langle k \rangle = 15.6$ ; Search vol.: 8196 = 112.2 resels (resel = 73.1 vertices). Target: Extent threshold: 43; Smoothness FWHM = 4.3 4.3 4.3 (vertices); Expected bins per cluster,  $\langle k \rangle = 15.6$ ; Search vol.: 8196 = 103.3 resels (resel = 79.4 vertices). Standard: Extent threshold: 51; Smoothness FWHM = 4.8 4.8 4.8 (vertices); Expected bins per cluster,  $\langle k \rangle = 21.8$ ; Search vol.: 8196 = 73.6 resels (resel = 111.4 vertices). Distractor: Extent threshold: 46; Smoothness FWHM = 4.4 4.4 4.4 (vertices); Expected bins per cluster,  $\langle k \rangle = 16.8$ ; Search vol.: 8196 = 96.2 resels (resel = 85.2 vertices).

Suggested deafness during hypnosis and simulation of hypnosis compared to a distraction and control condition:  
A study on subjective experience and cortical brain responses.

**Table S1-15.** Statistical results of the  $t$ -contrast: Target > Standard in the control (CON), distraction (DIS), hypnosis (HYP), and simulation (SIM) condition at the source-level within the P3b window (320–470 ms).

| Region                           | CON: Target > Standard |                |       |            |              |     |     |     |
|----------------------------------|------------------------|----------------|-------|------------|--------------|-----|-----|-----|
|                                  | Cluster-level          |                |       | Peak-level |              |     |     |     |
|                                  | $p_{Label}$            | $p_{FWE-corr}$ | $K_E$ | $t$ -value | $p_{uncorr}$ | MNI |     |     |
|                                  |                        |                |       |            |              | mm  | mm  | mm  |
| l LOC                            | .37                    | <.001          | 235   | 7.75       | <.001        | -10 | -62 | 62  |
| r PCu                            | .42                    | <.001          | 154   | 7.67       | <.001        | 8   | -61 | 60  |
| r MTG                            | .53                    | .001           | 83    | 7.35       | <.001        | 62  | -18 | -17 |
| l MTG                            | .05                    | .002           | 78    | 6.79       | <.001        | -47 | -13 | -15 |
| r PrG                            | .29                    | .001           | 85    | 6.39       | <.001        | 12  | -18 | 71  |
| r OFG                            | .40                    | <.001          | 132   | 5.98       | <.001        | 38  | -81 | -17 |
| l OFG                            | .40                    | <.001          | 125   | 5.85       | <.001        | -22 | -78 | -7  |
| l PrG                            | .21                    | .002           | 77    | 5.64       | <.001        | -10 | -17 | 70  |
| l LOC                            | .73                    | .045           | 35    | 5.32       | <.001        | -43 | -73 | 36  |
| l MFG                            | .45                    | .029           | 41    | 4.58       | <.001        | -42 | 21  | 37  |
| l ITG                            | .50                    | .003           | 72    | 4.19       | <.001        | -57 | -60 | -17 |
| <b>DIS: Target &gt; Standard</b> |                        |                |       |            |              |     |     |     |
| l LOC                            | .39                    | <.001          | 265   | 8.82       | <.001        | -12 | -59 | 65  |
| r PCu                            | .32                    | <.001          | 291   | 8.66       | <.001        | 11  | -57 | 58  |
| r OP                             | .51                    | .001           | 97    | 5.96       | <.001        | 20  | -99 | -12 |
| l PrG                            | .38                    | <.001          | 117   | 5.75       | <.001        | -14 | -27 | 70  |
| r MTG                            | .46                    | <.001          | 117   | 5.74       | <.001        | 53  | -1  | -29 |
| l OP                             | .53                    | <.001          | 244   | 5.32       | <.001        | -11 | -94 | -6  |
| l MTG                            | .05                    | .006           | 63    | 4.86       | <.001        | -47 | -13 | -15 |
| l FP                             | .44                    | .007           | 61    | 4.51       | <.001        | -16 | 62  | 10  |
| r FP                             | .34                    | .050           | 34    | 4.13       | <.001        | 14  | 64  | -4  |
| <b>HYP: Target &gt; Standard</b> |                        |                |       |            |              |     |     |     |
| l MTG                            | .50                    | .005           | 63    | 6.59       | <.001        | -52 | 0   | -29 |
| r MTG                            | .30                    | <.001          | 103   | 6.57       | <.001        | 58  | -14 | -19 |
| r OFG                            | .59                    | <.001          | 102   | 5.81       | <.001        | 19  | -84 | -14 |
| l OFG                            | .40                    | .009           | 54    | 5.78       | <.001        | -22 | -78 | -7  |
| r LOC                            | .55                    | .016           | 47    | 5.39       | <.001        | 20  | -83 | 42  |
| l LOC                            | .47                    | <.001          | 138   | 5.12       | <.001        | -15 | -84 | 40  |
| r PCu                            | .38                    | .002           | 77    | 4.94       | <.001        | 10  | -59 | 54  |
| l SFG                            | .32                    | .019           | 45    | 4.21       | <.001        | -10 | 3   | 66  |
| r SFG                            | .35                    | .003           | 70    | 4.00       | <.001        | 9   | 4   | 68  |
| <b>SIM: Target &gt; Standard</b> |                        |                |       |            |              |     |     |     |
| r MTG                            | .46                    | <.001          | 113   | 5.99       | <.001        | 53  | -1  | -29 |
| l MTG                            | .50                    | .003           | 68    | 5.76       | <.001        | -52 | 0   | -29 |
| r PCu                            | .24                    | .007           | 57    | 5.30       | <.001        | 13  | -55 | 57  |
| l LOC                            | .22                    | .004           | 65    | 5.24       | <.001        | -13 | -59 | 58  |
| r OP                             | .31                    | .036           | 36    | 4.87       | <.001        | 17  | -94 | -15 |
| r PrG                            | .29                    | .013           | 49    | 4.71       | <.001        | 10  | -23 | 71  |
| l SMC                            | .34                    | .046           | 33    | 4.13       | <.001        | -6  | -10 | 71  |
| l MFG                            | .45                    | .036           | 36    | 4.04       | <.001        | -42 | 21  | 37  |

MNI = Montreal Neurological Institute Coordinate System; l = left; r = right; LOC = lateral occipital cortex; PCu = precuneus; MTG = middle temporal gyrus; OFG = occipital fusiform gyrus; PrG = precentral gyrus; SFG = superior frontal gyrus; SMA = supplementary motor cortex (juxtastriatal lobule cortex);  $p_{Label}$  = probability of the vertex being a member of the different labelled regions within the Harvard-Oxford Subcortical/Cortical Structural Atlas.  $K_E$  = cluster with  $K_E$  elements; Statistics:  $p_{FWE-corr}$  = Family-wise-error corrected  $p$ -values adjusted for search volume. Height threshold:  $T = 3.12$ ,  $p = .001$  (uncorrected);  $df = [1, 94]$ ; HYP: Extent threshold: 45; Smoothness FWHM = 4.0 4.0 4.0 (vertices); Expected bins per cluster,  $\langle k \rangle = 15.6$ ; Search vol.: 8196 = 112.2 resels (resel = 73.1 vertices). CON: Extent threshold: 35; Smoothness FWHM = 4.0 4.0 4.0 (vertices); Expected bins per cluster,  $\langle k \rangle = 15.6$ ; Search vol.: 8196 = 125.7 resels (resel = 65.2 vertices). DIS:  $df = [1, 225]$ ; Extent threshold: 36; Smoothness FWHM = 4.1 4.1 4.1 (vertices); Expected bins per cluster,  $\langle k \rangle = 15.1$ ; Search vol.: 8196 = 115.4 resels (resel = 71.0 vertices). SIM:  $df = [1, 234]$ ; Extent threshold: 37; Smoothness FWHM = 4.2 4.2 4.2 (vertices); Expected bins per cluster,  $\langle k \rangle = 15.3$ ; Search vol.: 8196 = 114.2 resels (resel = 71.8 vertices).

Suggested deafness during hypnosis and simulation of hypnosis compared to a distraction and control condition:  
A study on subjective experience and cortical brain responses.

**Table S1-16.** Statistical results of the *t*-contrast: Target > Distractor in the hypnosis (HYP), control (CON), distraction (DIS), and simulation (SIM) condition at the source-level within the P3b window (320–470 ms).

| Region                             | CON: Target > Distractor |                |       |            |              |     |     |     |
|------------------------------------|--------------------------|----------------|-------|------------|--------------|-----|-----|-----|
|                                    | Cluster-level            |                |       | Peak-level |              |     |     |     |
|                                    | $p_{Label}$              | $p_{FWE-corr}$ | $K_E$ | $t$ -value | $p_{uncorr}$ | MNI |     |     |
|                                    |                          |                |       |            |              | mm  | mm  | mm  |
| l LOC                              | .37                      | <.001          | 154   | 6.63       | <.001        | -10 | -62 | 62  |
| r PCu                              | .42                      | <.001          | 129   | 6.39       | <.001        | 8   | -61 | 60  |
| r MTG                              | .22                      | .005           | 64    | 5.91       | <.001        | 55  | -17 | -17 |
| l PrG                              | .31                      | .011           | 54    | 5.63       | <.001        | -37 | -34 | 44  |
| l MTG                              | .36                      | .007           | 60    | 5.40       | <.001        | -57 | -14 | -20 |
| r PRG                              | .29                      | .006           | 62    | 5.15       | <.001        | 12  | -18 | 71  |
| l OFG                              | .46                      | .036           | 38    | 4.83       | <.001        | -21 | -74 | -8  |
| r OFG                              | .53                      | .006           | 62    | 4.74       | <.001        | 19  | -76 | -13 |
| l PRG                              | .15                      | .031           | 40    | 4.40       | <.001        | -10 | -12 | 69  |
| <b>DIS: Target &gt; Distractor</b> |                          |                |       |            |              |     |     |     |
| l LOC                              | .39                      | <.001          | 224   | 7.52       | <.001        | -12 | -59 | 65  |
| r PCu                              | .32                      | .001           | 90    | 7.22       | <.001        | 11  | -57 | 58  |
| r PrG                              | .36                      | .002           | 77    | 5.93       | <.001        | 14  | -20 | 69  |
| l PrG                              | .38                      | .008           | 60    | 4.49       | <.001        | -14 | -27 | 70  |
| l OP                               | .48                      | .047           | 35    | 3.88       | <.001        | 0   | -96 | -4  |
| <b>HYP: Target &gt; Distractor</b> |                          |                |       |            |              |     |     |     |
| l OFG                              | .40                      | .038           | 36    | 4.56       | <.001        | -22 | -78 | -7  |
| r MTG                              | .75                      | .016           | 47    | 4.07       | <.001        | 65  | -15 | -17 |
| r PCu                              | .38                      | .008           | 56    | 4.03       | <.001        | 10  | -59 | 54  |
| l MTG                              | .28                      | .033           | 38    | 3.99       | <.001        | -59 | -12 | -24 |
| l PCu                              | .48                      | .004           | 66    | 3.97       | <.001        | -7  | -63 | 58  |
| <b>SIM: Target &gt; Distractor</b> |                          |                |       |            |              |     |     |     |
| n.s.                               |                          |                |       | n.s.       |              |     |     |     |

MNI = Montreal Neurological Institute Coordinate System; l = left; r = right; MTG = middle temporal gyrus; SPL = superior parietal lobule; LOC = lateral occipital cortex; OFG = occipital fusiform gyrus; PRG = precentral gyrus; SFG = superior frontal gyrus; SMA = supplementary motor cortex (juxtastriatal lobule cortex);  $p_{Label}$  = probability of the vertex being a member of the different labelled regions within the Harvard-Oxford Subcortical/Cortical Structural Atlas.  $K_E$  = cluster with  $K_E$  elements; Statistics:  $p_{FWE-corr}$  = Family-wise-error corrected *p*-values adjusted for search volume. Height threshold:  $T = 3.12$ ,  $p = .001$  (uncorrected);  $df = [1, 94]$ ; HYP: Extent threshold: 36; Smoothness FWHM = 4.0 4.0 4.0 (vertices); Expected bins per cluster,  $\langle k \rangle = 15.6$ ; Search vol.: 8196 = 132.5 resels (resel = 61.8 vertices). CON: Extent threshold: 35; Smoothness FWHM = 4.0 4.0 4.0 (vertices); Expected bins per cluster,  $\langle k \rangle = 15.6$ ; Search vol.: 8196 = 125.7 resels (resel = 65.2 vertices). DIS: Extent threshold: 36; Smoothness FWHM = 4.1 4.1 4.1 (vertices); Expected bins per cluster,  $\langle k \rangle = 15.1$ ; Search vol.: 8196 = 122.3 resels (resel = 67.0 vertices).

Suggested deafness during hypnosis and simulation of hypnosis compared to a distraction and control condition: A study on subjective experience and cortical brain responses.

**Table S1-17.** Statistics of the effect of distraction (CON > DIS), hypnosis (CON > HYP), and simulation (CON > SIM) for the processing of target stimuli at source-level.

| Region            | Target: CON > DIS |                |       |            |              |     |     |     |
|-------------------|-------------------|----------------|-------|------------|--------------|-----|-----|-----|
|                   | Cluster-level     |                |       | Peak-level |              |     |     |     |
|                   | $p_{Label}$       | $p_{FWE-corr}$ | $K_E$ | $t$ -value | $p_{uncorr}$ | MNI |     |     |
|                   |                   |                |       |            |              | mm  | mm  | mm  |
| l LOC             | .18               | .003           | 79    | 5.77       | <.001        | -18 | -59 | 50  |
| r SPL             | .24               | .003           | 77    | 5.23       | <.001        | 18  | -56 | 53  |
| Target: CON > HYP |                   |                |       |            |              |     |     |     |
| l SPL             | .36               | <.001          | 188   | 6.26       | <.001        | -38 | -40 | 60  |
| r SPL             | .31               | .003           | 79    | 5.58       | <.001        | 21  | -55 | 65  |
| Target: CON > SIM |                   |                |       |            |              |     |     |     |
| l LOC             | .22               | <.001          | 226   | 9.62       | <.001        | -13 | -59 | 58  |
| r PCu             | .32               | <.001          | 143   | 9.41       | <.001        | 11  | -57 | 58  |
| r PrG             | .34               | .001           | 96    | 6.52       | <.001        | 15  | -26 | 67  |
| r OFG             | .40               | .001           | 89    | 6.07       | <.001        | 38  | -81 | -17 |
| l PrG             | .38               | .001           | 83    | 4.93       | <.001        | -14 | -27 | 70  |

HYP = hypnosis; CON = control, DIS = distraction; SIM = simulation; l = left; r = right; LOC = lateral occipital cortex; SPL = superior parietal cortex; OFG = occipital fusiform gyrus; PCu = precuneous. RMS = root mean square (a.u.); MNI = Montreal Neurological Institute Coordinate System;  $p_{FWE-corr}$  = Family-wise-error corrected  $p$ -values adjusted for search volume;  $K_E$  = cluster with  $K$  elements; Height threshold:  $T = 3.13$ ,  $p = .001$  (uncorrected); DIS:  $df = 234$ ; Extent threshold: 77; Smoothness FWHM = 4.2 4.2 4.2 (vertices); Expected bins per cluster,  $\langle k \rangle = 15.2$ ; Search vol.: 8196 = 114.5 resels (resel = 71.6 vertices); HYP:  $df = 235$ ; Extent threshold: 79; Smoothness FWHM = 4.2 4.2 4.2 (vertices); Expected bins per cluster,  $\langle k \rangle = 15.6$ ; Search vol.: 8196 = 112.2 resels (resel = 73.1 vertices); SIM:  $df = 232$ ; Extent threshold: 66; Smoothness FWHM = 4.2 4.2 4.2 (vertices); Expected bins per cluster,  $\langle k \rangle = 13.6$ ; Search vol.: 8196 = 128.1 resels (resel = 64.0 vertices);

## REFERENCES

SPM. (2018). Group Analysis. Retrieved from [https://en.wikibooks.org/w/index.php?title=SPM/Group\\_Analysis&oldid=3373190](https://en.wikibooks.org/w/index.php?title=SPM/Group_Analysis&oldid=3373190)
